# Supplementary material for: MoS2@CoFe-MOF catalysts achieved by one-pot hydrothermal synthesis enhanced electronic interactions between MoS2 nanoflowers and a bimetallic MOF for efficient oxygen evolution
Source: Royal Society of Chemistry journal article supplement (doi:10.1039/d4nj02380c), 2024-01-01
Supplement: d4nj02380c1.pdf [file d4nj02380c1.pdf]

# Supplementary Material

## MoS<sub>2</sub>@CoFe-MOF catalysts by one-pot hydrothermal synthesis enhanced electron interaction between MoS<sub>2</sub> nanoflower and bimetallic MOF for efficient oxygen evolution

Jiahui Li, Yufen Wang, Qinyuan Yu, Xuedong Wei\*

Key Laboratory of Magnetic Molecules & Magnetic Information Materials Ministry of Education,  
School of Chemistry & Material Science, Shanxi Normal University, Taiyuan 030031, PR China.

### Table of contents

|                                                                                                                                                                                                                                                                                                                                                               |     |
|---------------------------------------------------------------------------------------------------------------------------------------------------------------------------------------------------------------------------------------------------------------------------------------------------------------------------------------------------------------|-----|
| <b>Supplementary Material</b> .....                                                                                                                                                                                                                                                                                                                           | S1  |
| <b>Supplementary Figures</b> .....                                                                                                                                                                                                                                                                                                                            | S2  |
| Fig. S1. (a-c) SEM images of the MoS <sub>2</sub> , (d-e) SEM images of the MoS <sub>2</sub> @Co-MOF(CC). .....                                                                                                                                                                                                                                               | S2  |
| Fig. S2. TEM images of the MoS <sub>2</sub> @CoFe-MOF. ....                                                                                                                                                                                                                                                                                                   | S3  |
| Fig. S3. (a) The XPS survey of the MoS <sub>2</sub> @CoFe-MOF sample. ....                                                                                                                                                                                                                                                                                    | S4  |
| Fig. S4. XPS spectra of C 1s in MoS <sub>2</sub> @CoFe-MOF and CoFe-MOF. ....                                                                                                                                                                                                                                                                                 | S5  |
| Fig. S5. MoS <sub>2</sub> @Co-MOF(CC): (a) XPS full spectra, (b-d) XPS spectra of Mo 3d, Co 2p, S 2p.<br>.....                                                                                                                                                                                                                                                | S6  |
| Fig. S6. CV curve of the non-Faraday voltage range (a) CoFe-MOF(CC), (b) MoS <sub>2</sub> (CC), (c)<br>MoS <sub>2</sub> @Co-MOF(CC), (d) MoS <sub>2</sub> @Fe-MOF(CC). ....                                                                                                                                                                                   | S7  |
| Fig. S7. MoS <sub>2</sub> @CoFe-MOF(CC) after the stability test: (a) XRD patterns, (b) XPS spectra,<br>(c-h) XPS spectra of Mo 3d, Co 2p, Fe 2p, S 2p, O 1s and C 1s. ....                                                                                                                                                                                   | S8  |
| Fig. S8. MoS <sub>2</sub> @Fe-MOF(CC), MoS <sub>2</sub> @Co-MOF(CC), MoS <sub>2</sub> @CoFe-MOF(CC): (a) LSV<br>curves, (b) Electrochemical impedance diagram, (c) Stability test curves, (d) Plots of the current<br>density difference ( $\Delta j = j_a - j_c$ ) at the central potential of the potential window (vs. RHE) against<br>the scan rate. .... | S9  |
| Fig. S9. Stability test curves of MoS <sub>2</sub> @CoFe-MOF(CC) at 50 mA·cm <sup>-2</sup> . ....                                                                                                                                                                                                                                                             | S10 |
| Figure S10. (a) The TOFs of different catalysts at the overpotentials of 220 mV, (b) Gas<br>production measured by drainage. ....                                                                                                                                                                                                                             | S11 |
| Figure S11. (a) XRD patterns of MoS <sub>2</sub> @Co-MOF .....                                                                                                                                                                                                                                                                                                | S12 |
| Table S1 Comparison of alkaline OER performance with other previously reported transition<br>metal-based electrocatalysts. ....                                                                                                                                                                                                                               | S13 |
| Table S2 Elements content comparison from XPS and EDS methods of MoS <sub>2</sub> @CoFe-MOF<br>sample. ....                                                                                                                                                                                                                                                   | S14 |

## Supplementary Figures

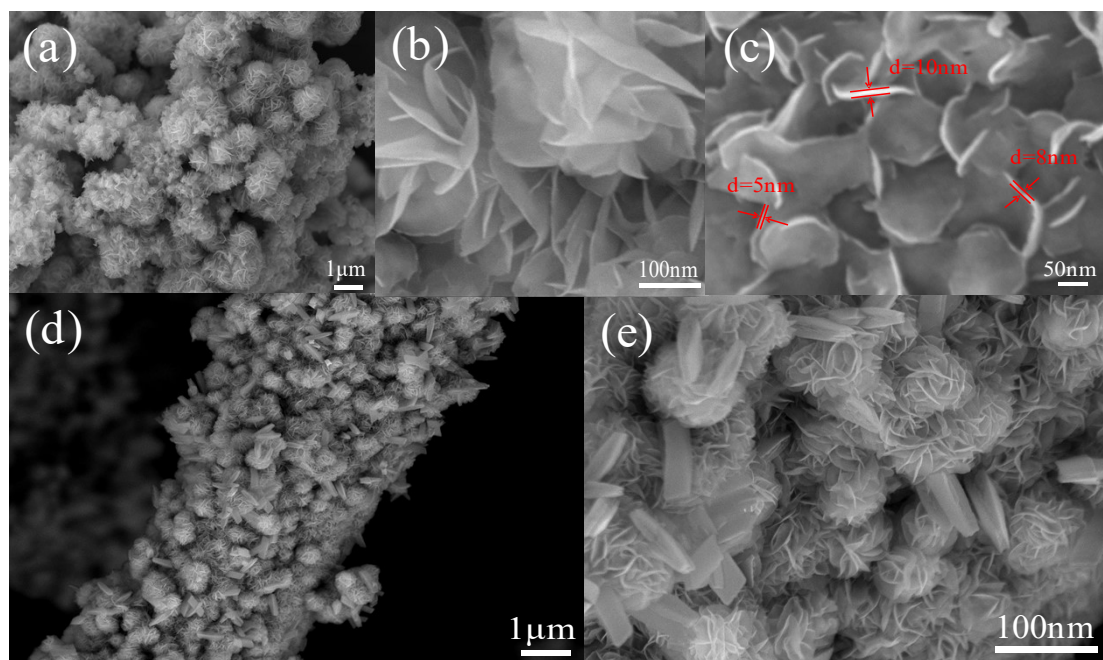

**Fig. S1.** (a-c) SEM images of the MoS<sub>2</sub>, (d-e) SEM images of the MoS<sub>2</sub>@Co-MOF(CC).

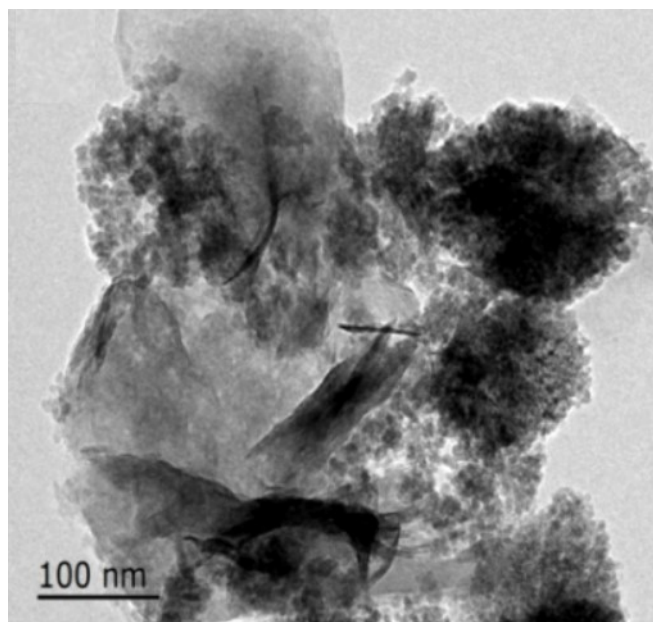

**Fig. S2.** TEM images of the MoS<sub>2</sub>@CoFe-MOF.

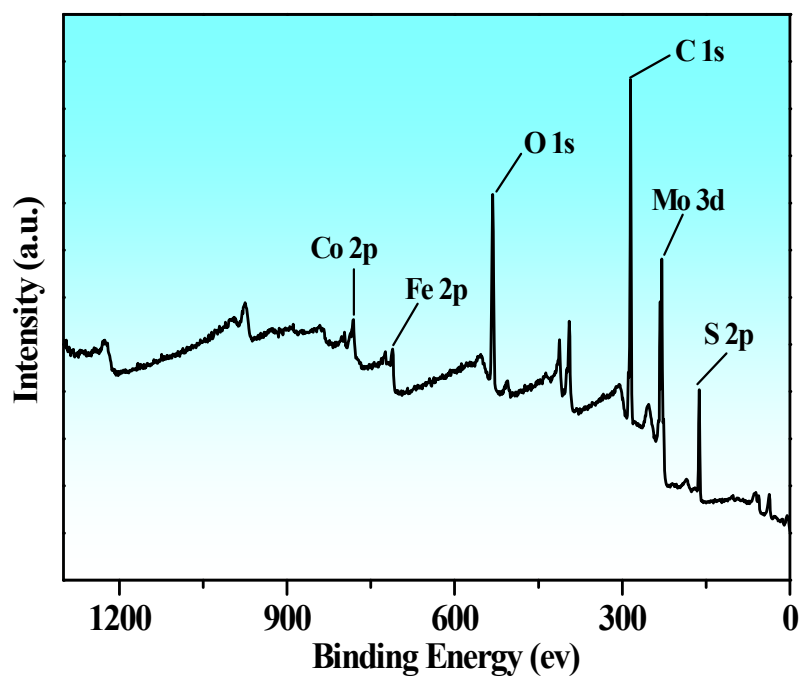

**Fig. S3.** (a) The XPS survey of the MoS<sub>2</sub>@CoFe-MOF(CC).

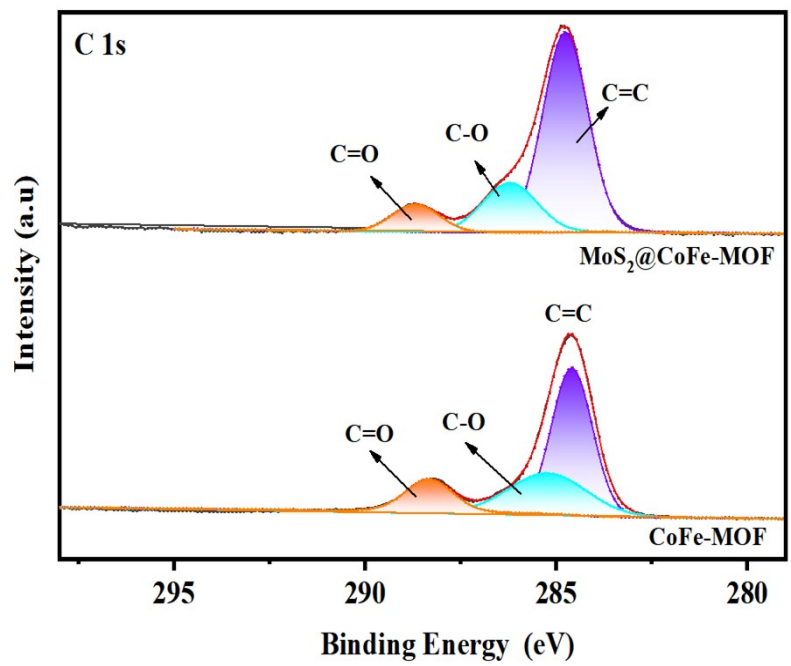

**Fig. S4.** XPS spectra of C 1s in MoS<sub>2</sub>@CoFe-MOF and CoFe-MOF.

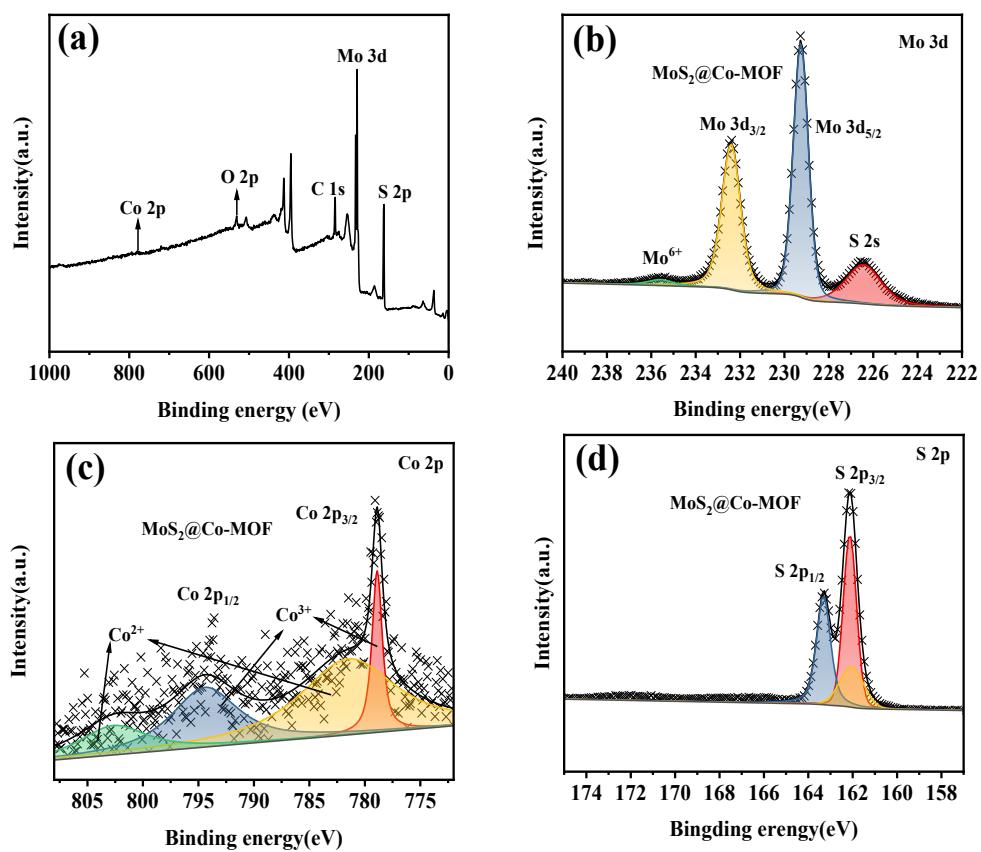

**Fig. S5.** MoS<sub>2</sub>@Co-MOF(CC): (a) XPS full spectra, (b-d) XPS spectra of Mo 3d, Co 2p, S 2p.

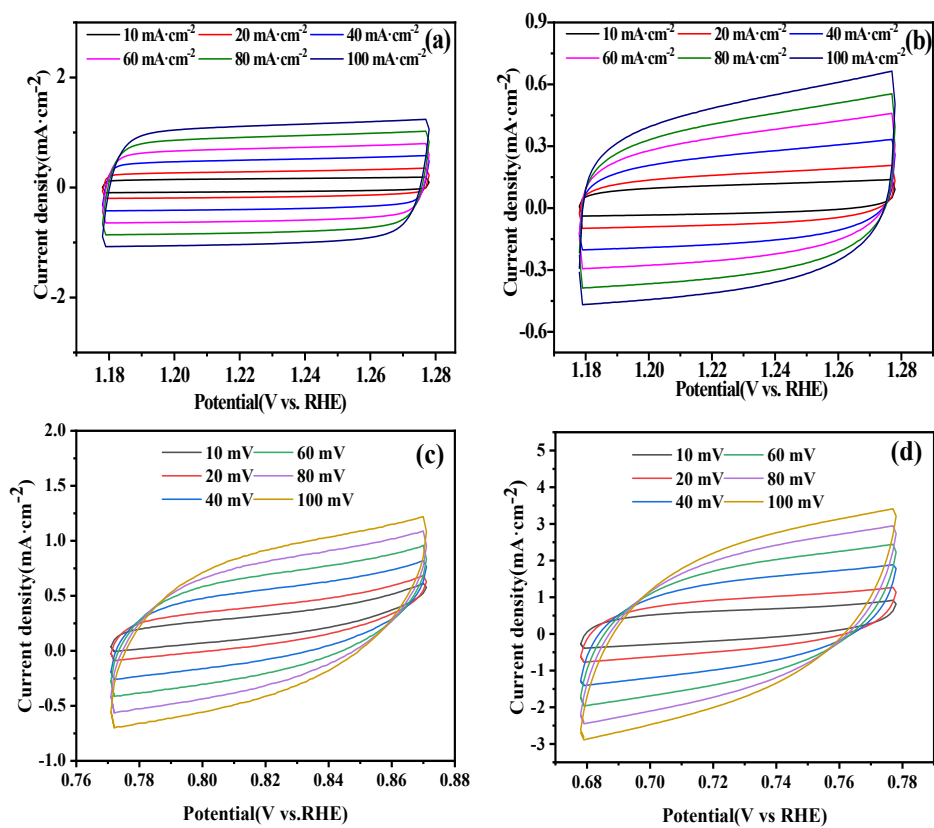

**Fig. S6.** CV curve of the non-Faraday voltage range (a) CoFe-MOF(CC), (b) MoS<sub>2</sub>(CC), (c) MoS<sub>2</sub>@Co-MOF(CC), (d) MoS<sub>2</sub>@Fe-MOF(CC).

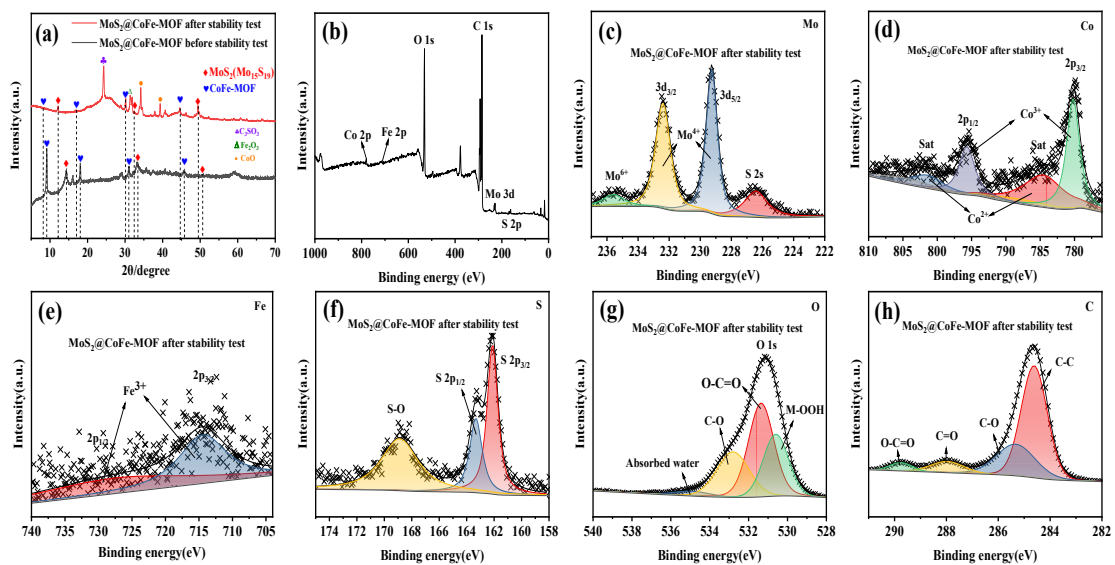



**Fig. S7.** MoS<sub>2</sub>@CoFe-MOF(CC) after the stability test: (a) XRD patterns, (b) XPS spectra, (c-h) XPS spectra of Mo 3d, Co 2p, Fe 2p, S 2p, O 1s and C1s.

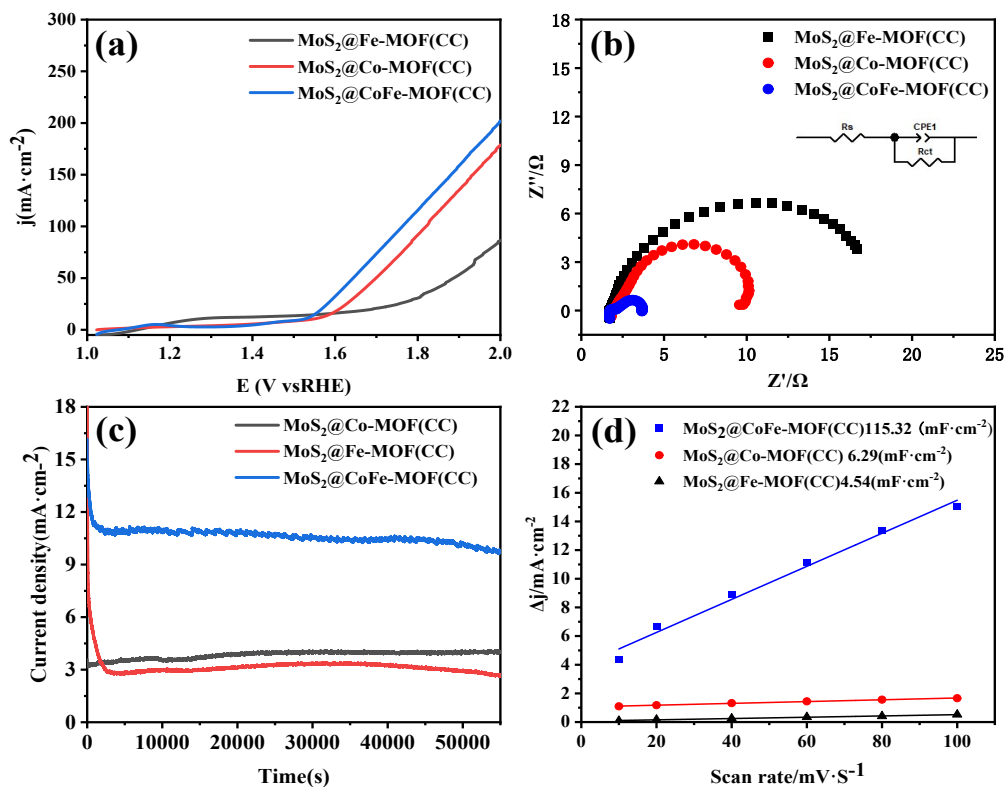

**Fig. S8.** MoS<sub>2</sub>@Fe-MOF(CC), MoS<sub>2</sub>@Co-MOF(CC), MoS<sub>2</sub>@CoFe-MOF(CC): (a) LSV curves, (b) Electrochemical impedance diagram, (c) Stability test curves, (d) Plots of the current density difference ( $\Delta j = j_a - j_c$ ) at the central potential of the potential window (vs. RHE) against the scan rate.

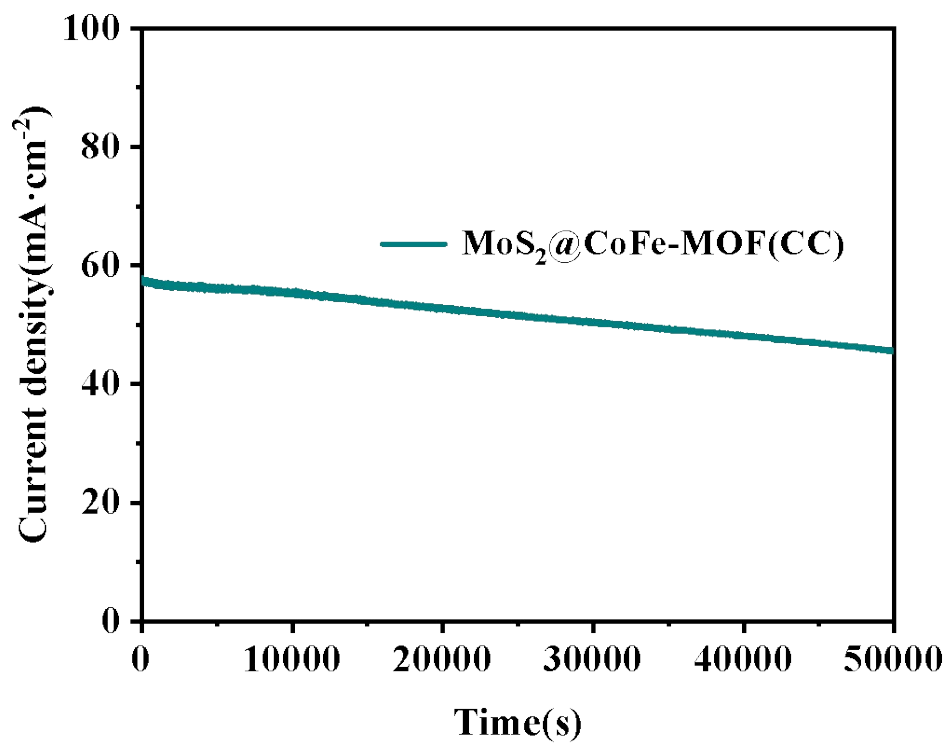

Fig. S9. Stability test curves of MoS<sub>2</sub>@CoFe-MOF(CC) at 50 mA·cm<sup>-2</sup>.

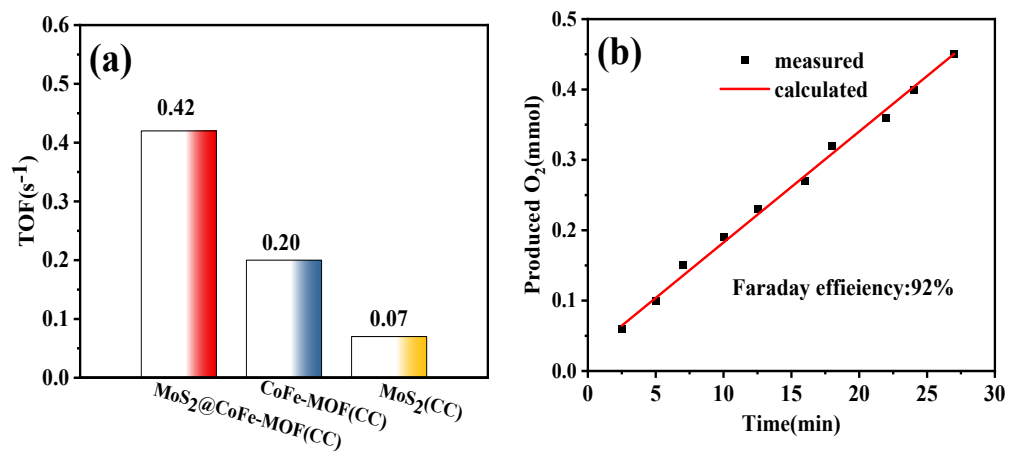

**Figure S10.** (a) The TOFs of different catalysts at the overpotentials of 220 mV, (b) Gas production measured by drainage.

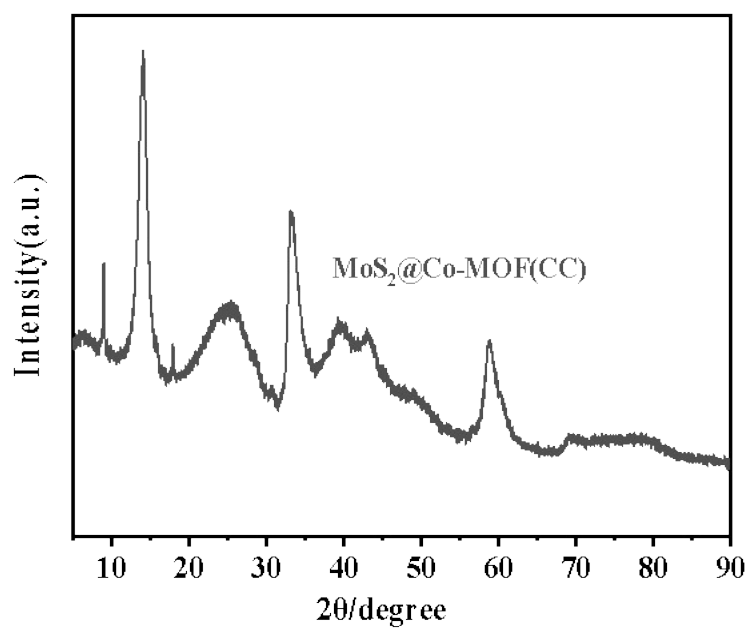

**Figure S11. (a) XRD patterns of MoS<sub>2</sub>@Co-MOF.**

**Table S1** Comparison of alkaline OER performance with other previously reported transition metal-based electrocatalysts.

| Electrocatalysts                                                                 | Electrolyte | Substrate | Overpotential<br>(10 mA·cm <sup>-2</sup> ) | Tafel slope<br>[mV·dec <sup>-1</sup> ] | Ref       |
|----------------------------------------------------------------------------------|-------------|-----------|--------------------------------------------|----------------------------------------|-----------|
| MoS <sub>2</sub> @CoFe-MOF                                                       | 1 M KOH     | CC        | 220mV                                      | 18.04                                  | This work |
| (Ni <sub>2</sub> Co <sub>1</sub> ) <sub>0.925</sub> Fe <sub>0.075</sub> -<br>MOF | 1 M KOH     | GCE       | 257mV                                      | 41.3                                   | 1         |
| FeCo-MNS-1.0                                                                     | 0.1 M KOH   | Pt-foil   | 298mV                                      | 21.6                                   | 2         |
| CoMoSeS                                                                          | 1 M KOH     | CC        | 375mV                                      | 60                                     | 3         |
| MoS <sub>2</sub> Nano Islands                                                    | 1 M KOH     | GCE       | 300mV                                      | 45                                     | 4         |
| CoFe-MOF                                                                         | 1 M KOH     | GCE       | 265mV                                      | 44                                     | 5         |
| CoFe/C-650                                                                       | 1 M KOH     | GCE       | 246mV                                      | 45.27                                  | 6         |
| MoS <sub>2</sub>                                                                 | 1 M KOH     | NF        | 320mV                                      | 44                                     | 7         |
| Co, Nb-MoS <sub>2</sub> /TiO <sub>2</sub>                                        | 1 M KOH     | NF        | 260mV                                      | 81.2                                   | 8         |
| CoFeO <sub>x</sub> (OH) <sub>y</sub> /MoS <sub>2</sub> /CP<br>(CFOMS/CP)         | 1 M KOH     | CC        | 242mV                                      | 37.9                                   | 9         |
| CoMoS                                                                            | 1 M KOH     | CC        | 370mV                                      | 45                                     | 10        |

**Table S2** Elements content comparison from XPS and EDS methods of MoS<sub>2</sub>@CoFe-MOF sample.

| Test Method | XPS                                                                               | EDS                                                                                |
|-------------|-----------------------------------------------------------------------------------|------------------------------------------------------------------------------------|
| Spectrum    | 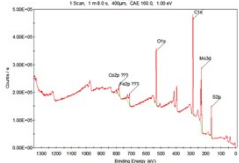 |  |
| Element     | at%                                                                               | at%                                                                                |
| C           | 52.53                                                                             | 16.01                                                                              |
| O           | 19.43                                                                             | 41.50                                                                              |
| Fe          | 1.85                                                                              | 4.27                                                                               |
| Co          | 8.57                                                                              | 17.02                                                                              |
| S           | 12.36                                                                             | 12.68                                                                              |
| Mo          | 5.26                                                                              | 8.52                                                                               |
| Total:      | 100.00                                                                            | 100.00                                                                             |

## References

- [1] Q. Qian, Y. Li, Y. Liu, L. Yu and G. Zhang, Ambient fast synthesis and active sites deciphering of hierarchical foam-like trimetal–organic framework nanostructures as a platform for highly efficient oxygen evolution electrocatalysis, *Adv. mater.*, 2019, 31, 1901139.
- [2] L. Zhuang, L. Ge, H. Liu, Z. Jiang, Y. Jia, Z. Li, D. Yang, R. K. Hocking, M. Li, L. Zhang and X. Wang, A surfactant-free and scalable general strategy for synthesizing ultrathin two-dimensional metal–organic framework nanosheets for the oxygen evolution reaction, *Angew. Chem.*, 2019, 131, 13699-13706.
- [3] B. K. Martini, L. S. Bezerra, S. Artemkina, V. Fedorov, P. K. Boruah, M. R. Das and G. Maia, Efficient OER nanocomposite electrocatalysts based on Ni and/or Co supported on MoSe<sub>2</sub> nanoribbons and MoS<sub>2</sub> nanosheets, *Chem. Eng. J. Adv.*, 2022, 9, 100206.
- [4] B. Chen, P. Hu, F. Yang, X. Hua, F.-F. Yang, F. Zhu, R. Sun, K. Hao, K. Wang and Z. Yin, In situ porousized MoS<sub>2</sub> nano islands enhance HER/OER bifunctional electrocatalysis, *Small*, 2023, 19, 2207177.
- [5] Z. Zou, T. Wang, X. Zhao, W.-J. Jiang, H. Pan, D. Gao and C. Xu, Expediting in-situ electrochemical activation of two-dimensional metal–organic frameworks for enhanced OER intrinsic activity by iron incorporation, *ACS Catal.*, 2019, 9, 7356-7364.
- [6] K. Srinivas, Y. Chen, Z. Su, B. Yu, M. Karpuraranjith, F. Ma, X. Wang, W. Zhang and D. Yang, Heterostructural CoFe<sub>2</sub>O<sub>4</sub>/CoO nanoparticles-embedded carbon nanotubes network for boosted overall water-splitting performanc, *Electrochim. Acta*, 2022, 404, 139745.
- [7] B. J. Rani, S. S. Pradeepa, Z. M. Hasan, G. Ravi, R. Yuvakkumar and S. I. Hong, Supercapacitor and OER activity of transition metal (Mo, Co, Cu) sulphides, *J. Phys. Chem. Solids*, 2020, 138, 109240.
- [8] D. C. Nguyen, T. L. L. Doan, S. Prabhakaran, D. T. Tran, D. H. Kim, J. H. Lee and N. H. Kim, Hierarchical Co and Nb dual-doped MoS<sub>2</sub> nanosheets shelled micro-TiO<sub>2</sub> hollow spheres as effective multifunctional electrocatalysts for HER, OER, and ORR, *Nano Energy*, 2021, 82, 105750.
- [9] C. Zhao, X. Zhang, S. Xu, G. Yang, J. Fan, J. Guo, W. Cai and C. Zhao, Construction of amorphous CoFeO<sub>x</sub>(OH)<sub>y</sub>/MoS<sub>2</sub>/CP electrode for superior OER performance, *Int. J. Hydrogen Energy*, 2022, 47, 28859-28868.
- [10] J. Hou, B. Zhang, Z. Li, S. Cao, Y. Sun, Y. Wu, Z. Gao and L. Sun, Vertically aligned oxygenated-CoS<sub>2</sub>–MoS<sub>2</sub> heteronanosheet architecture from polyoxometalate for efficient and stable overall water splitting, *ACS Catal.*, 2018, 8, 4612-4621.
